# Supplementary material for: Facile fabrication of thermally reduced graphene oxide–platinum nanohybrids and their application in catalytic reduction and dye-sensitized solar cells
Source: Royal Society of Chemistry journal article supplement (doi:10.1039/c5ra21896a), 2015-12-21
Supplement: c5ra21896a1.pdf [file c5ra21896a1.pdf]

## Electronic Supplementary Information

for

### **Facile fabrication of thermally reduced graphene oxide-platinum nano hybrids and their application in catalytic reduction and dye-sensitized solar cells**

*Nguyen Tri Khoa,<sup>a,c</sup> Doan Van Thuan,<sup>a,c</sup> Soon Wook Kim,<sup>a</sup> Sujung Park,<sup>a</sup> Tran Van Tam,<sup>b</sup> Won Mook Choi,<sup>b</sup> Shinuk Cho,<sup>a</sup> Eui Jung Kim<sup>b\*</sup> and Sung Hong Hahn<sup>a\*</sup>*

<sup>a</sup>Department of Physics and Energy Harvest-Storage Research Center, University of Ulsan, Ulsan 680-749, South Korea.

<sup>b</sup>Department of Chemical Engineering, University of Ulsan, Ulsan 680-749, South Korea.

<sup>c</sup>The author contributed equally to this work.

\*Corresponding authors:

Email: [shhahn@ulsan.ac.kr](mailto:shhahn@ulsan.ac.kr) (S. H. Hahn). Tel: +82-52-259-2330

Email: [ejkim@ulsan.ac.kr](mailto:ejkim@ulsan.ac.kr) (E. J. Kim). Tel: + 82-52-259-2832

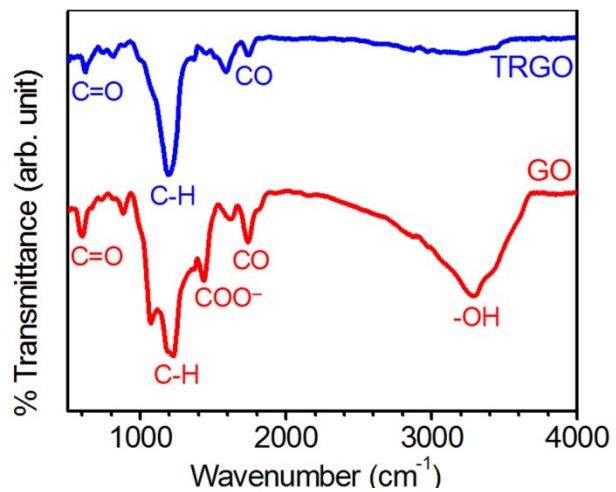

Figure S1. FTIR spectra of GO and TRGO.

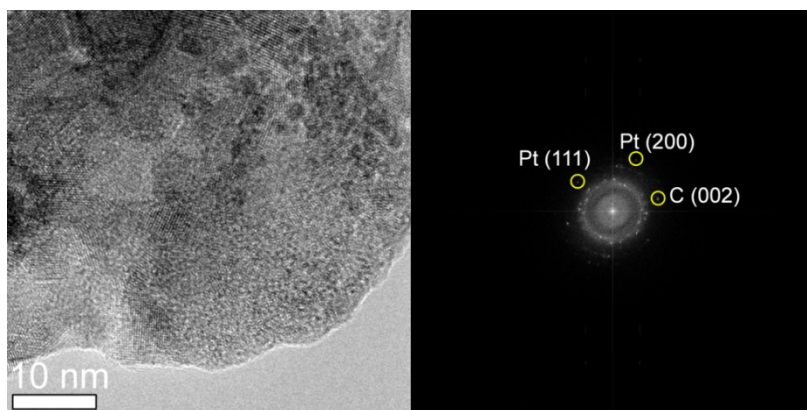

Figure S2. HRTEM image and corresponding FFT pattern of TRGO:Pt.

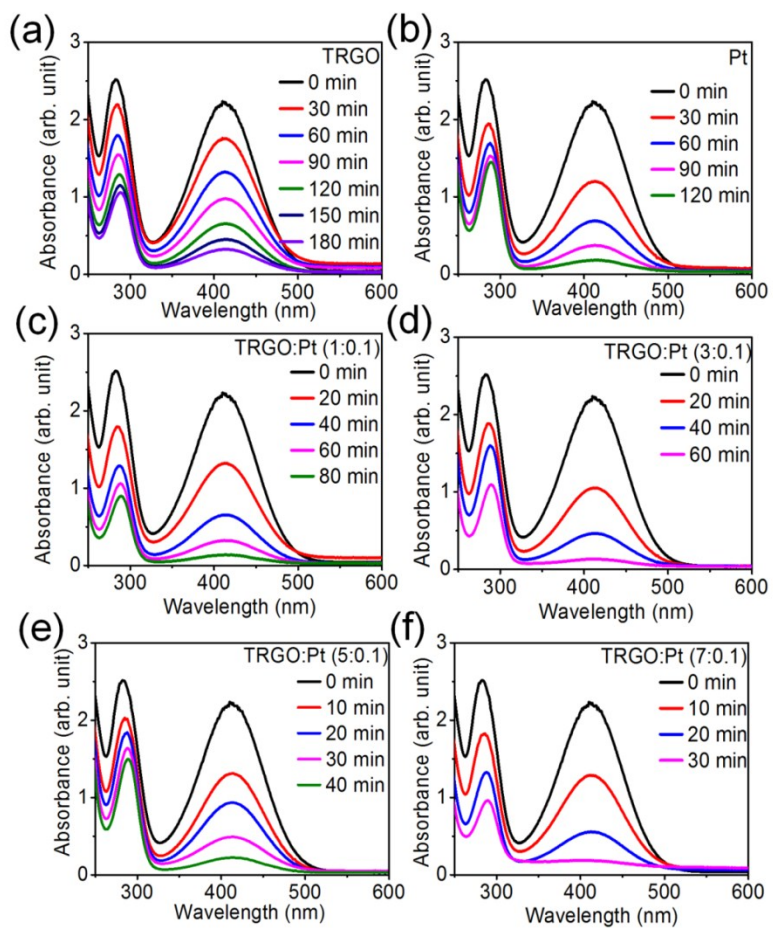

Figure S3. Absorption spectra of o-nitroaniline reduced over TRGO:Pt catalysts with different compositions.
